# Supplementary material for: A PGM-free NOx adsorber + selective catalytic reduction catalyst system (AdSCR) for trapping and reducing NOx in lean exhaust streams at low temperature
Source: Royal Society of Chemistry journal article supplement (doi:10.1039/c8cy00343b), 2018-01-01
Supplement: c8cy00343b1.pdf [file c8cy00343b1.pdf]

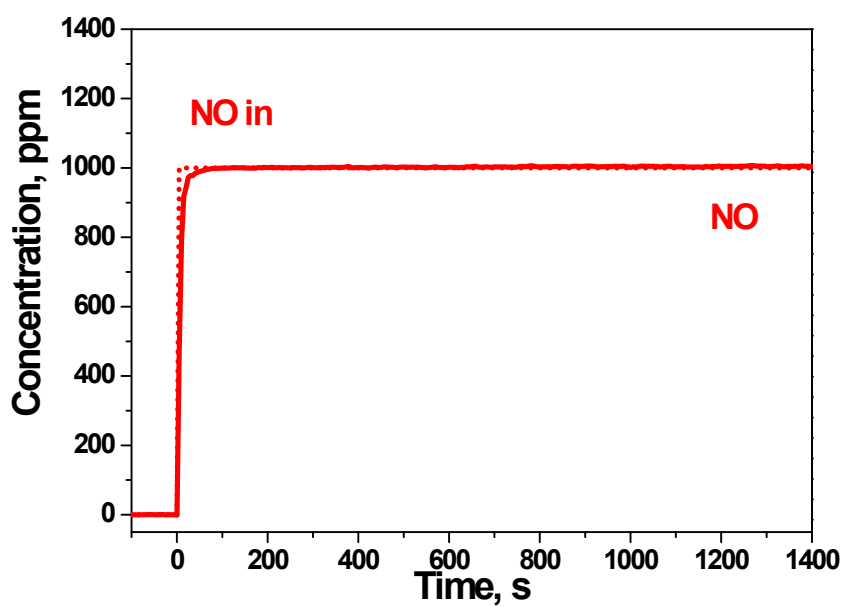

Figure S1- NO step feed: blank transient without catalyst (T=120°C)

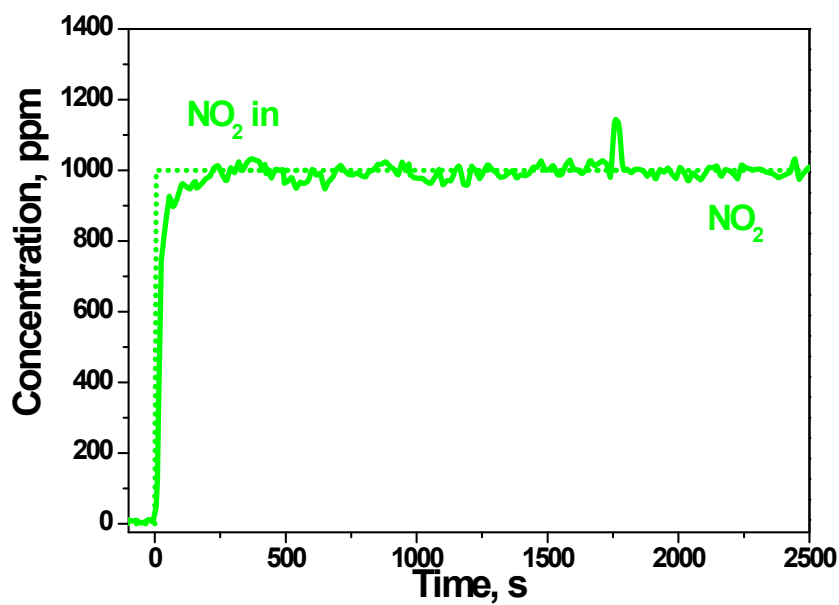

Figure S2- NO<sub>2</sub> step feed: blank transient without catalyst (T=120°C)

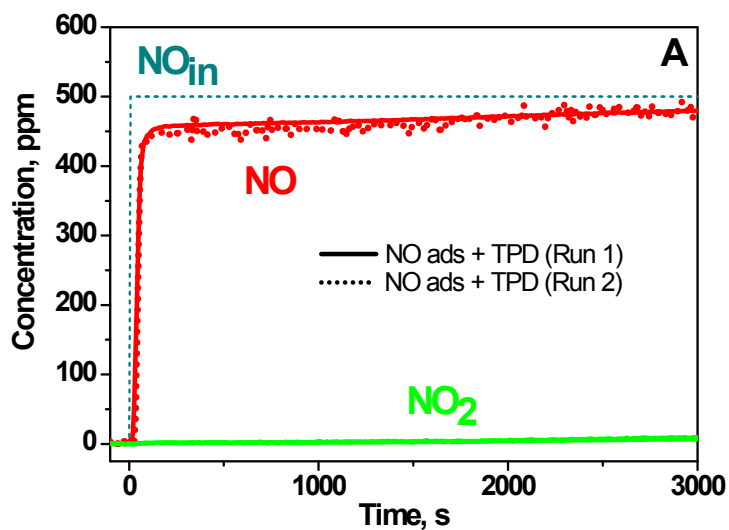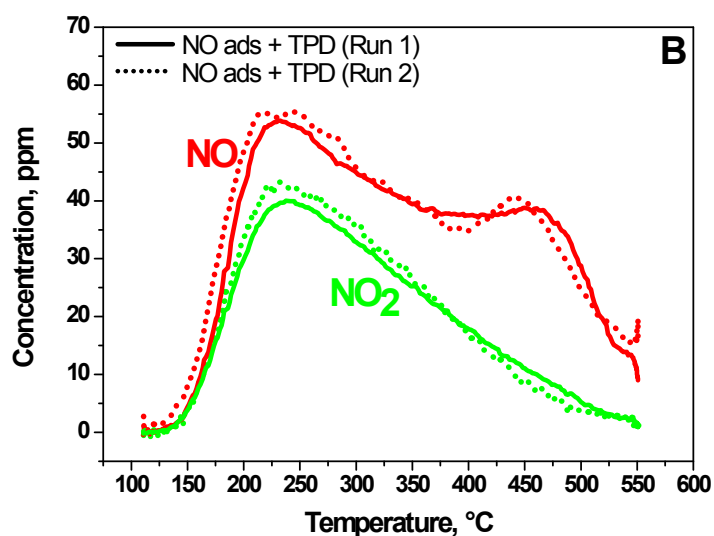

Figure S3- Reproducibility experiments: Fe-Ba-MM samples.  $NO+O_2$  isothermal adsorption at 120 °C.  $Q=120\text{ cm}^3/\text{min}$  (STP); feed:  $O_2=8\%$ ;  $H_2O=0\%$ ;  $CO_2=0\%$ ;  $NO=500\text{ ppm}$ . (A) Adsorption phase (B) TPD phase.

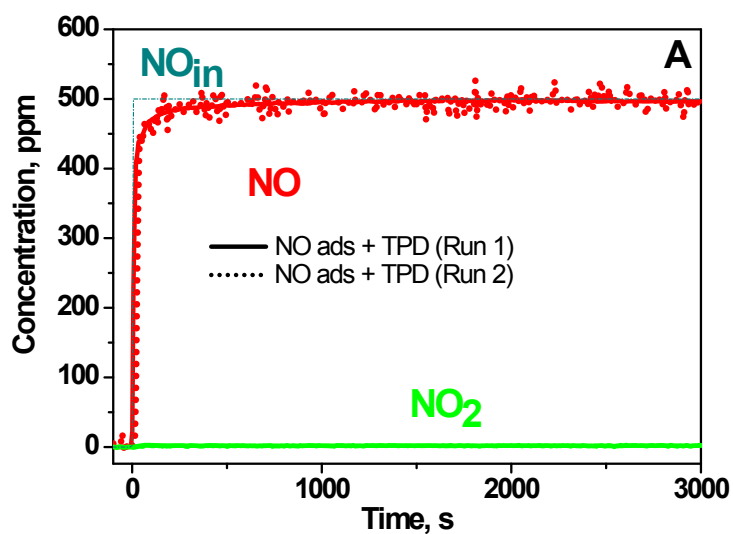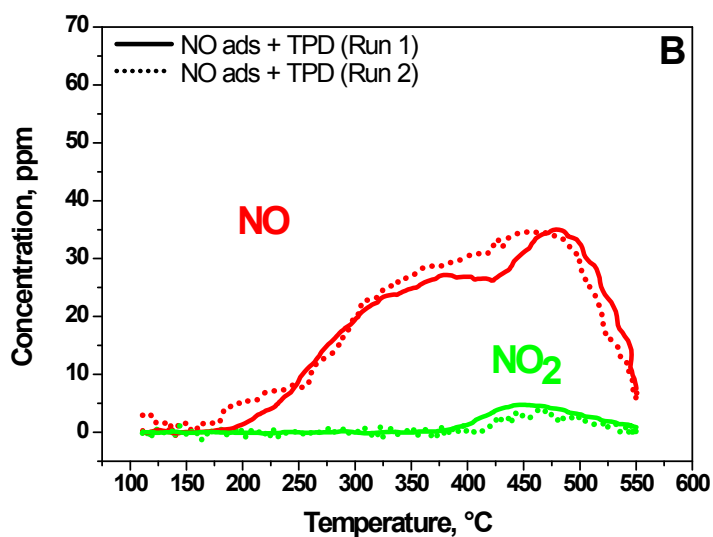

Figure S4- Reproducibility experiments: Fe-Ba-MM samples.  $NO+O_2$  isothermal adsorption at 120 °C.  $Q=120\text{ cm}^3/\text{min}$  (STP); feed:  $O_2=8\%$ ;  $H_2O=8\%$ ;  $CO_2=0\%$ ;  $NO=500\text{ ppm}$ . (A) Adsorption phase (B) TPD phase.
